# Supplementary material for: Low expression of BMPRIB indicates poor prognosis of breast cancer and is insensitive to taxane-anthracycline chemotherapy
Source: PubMed Central journal article supplement (PMC4826242; doi:10.18632/oncotarget.6613), 2015-12-14
Supplement: oncotarget-07-4770-s001.pdf [file oncotarget-07-4770-s001.pdf]

**SUPPLEMENTARY TABLE****Supplementary Table S1: Demographic data of IDC patients**

| Characteristics              | Value                  |
|------------------------------|------------------------|
| Age                          |                        |
| <50                          | 189                    |
| ≥50                          | 179                    |
| Mean ± SD, Median (range)    | 51.5± 10.3, 50 (28-89) |
| Histological grade†          |                        |
| I                            | 10                     |
| II                           | 272                    |
| III                          | 64                     |
| Estrogen receptor status     |                        |
| Negative                     | 122                    |
| Positive                     | 246                    |
| Progesterone receptor status |                        |
| Negative                     | 109                    |
| Positive                     | 259                    |
| HER2/neu status              |                        |
| Negative                     | 291                    |
| Positive                     | 77                     |
| Events†                      |                        |
| Death                        | 32                     |
| Censored                     | 325                    |
| Molecular subtypes†          |                        |
| Luminal A                    | 59                     |
| Luminal B                    | 211                    |
| Triple-negative              | 56                     |
| Her2-overexpressing          | 23                     |

†Some missing data.

IDC: invasive ductal carcinoma
